# Supplementary material for: Impact of Mononuclear Cell Infiltration on Chondrodestructive MMP/ADAMTS Production in Osteoarthritic Knee Joints—An Ex Vivo Study
Source: PubMed Central journal article supplement (PMC7288002; doi:10.3390/jcm9051279), 2020-04-28
Supplement: jcm-09-01279-s001.pdf [file jcm-09-01279-s001.pdf]

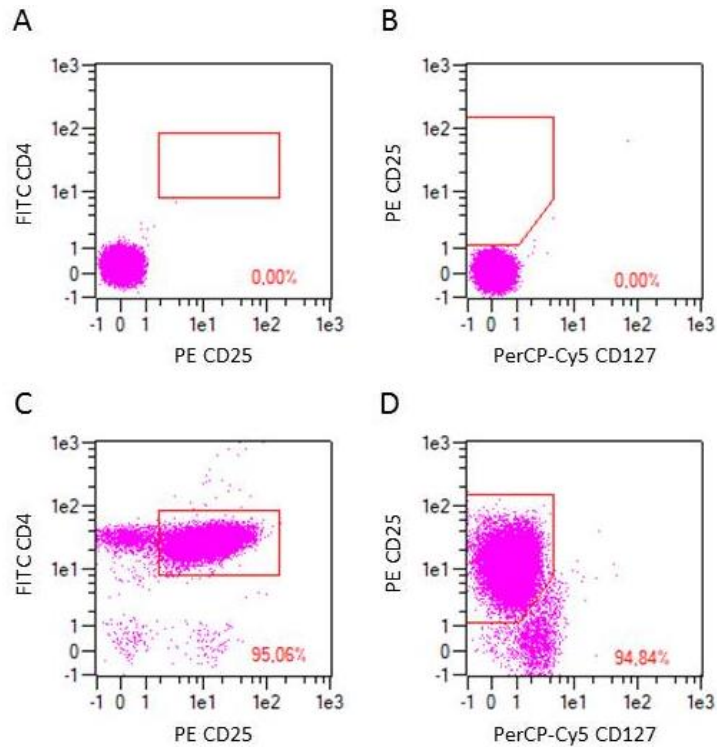

**Supplementary Figure S1:**

In the study presented the inflammatory impact of  $CD4^+CD127^{dim/-}$  enriched PBMC,  $CD4^+CD25^+CD127^{dim/-}$  regulatory T cells (Treg) and a population of Treg depleted  $CD4^+CD25^-CD127^{dim/-}$  enriched PBMC was analyzed in a chondrocyte co-culture experiment. In preliminary studies we confirmed successful Treg isolation process using the  $CD4^+CD25^+CD127^{dim/-}$  Regulatory T Cell Isolation Kit II human (Miltenyi Biotec, Germany) by flow cytometry.

A representative dot plot confirming successful Treg isolation (~95%) is shown here.

*A/B: Autofluorescence, C: FITC CD4 PE CD25 staining, D: PE CD25 PerCP-Cy5 CD127 staining*
